# Supplementary material for: Photochemical eco-friendly synthesis of photothermal and emissive copper nanoclusters in water: towards sustainable nanomaterials
Source: Royal Society of Chemistry journal article supplement (doi:10.1039/d4ma00401a), 2024-01-01
Supplement: d4ma00401a1.pdf [file d4ma00401a1.pdf]

**Electronic Supplementary Material**

# Photochemical Eco-Friendly Synthesis of Emissive Copper Nanoclusters in Water: Towards Sustainable Nanomaterials

Angelo Ferlazzo,<sup>\*a</sup> Stefano Bonforte,<sup>a</sup> Federica Florio,<sup>a</sup> Salvatore Petralia,<sup>\*b</sup> Lorenzo Sorace,<sup>c</sup>

Beatrice Muzzi,<sup>d</sup> Andrea Caneschi,<sup>\*e</sup> and Antonino Gulino<sup>\*a</sup>

a. Department of Chemical Sciences and INSTM Research Unit, University of Catania, Viale Andrea Doria 6, 95125 Catania, Italy. (antonino.gulino@unict.it).

b. Department of Drug and Health Science, University of Catania, Via Santa Sofia 64, 95125 Catania, Italy and Institute of Biomolecular Chemistry, CNR, Via Paolo Gaifami 18, 95126 Catania, Italy. (salvatore.petralia@unict.it).

c. Department of Chemistry “U. Schiff” and INSTM Research Unit, University of Florence, 50019 Sesto Fiorentino (FI) Italy.

d. CNR-ICCOM – Istituto di Chimica dei Composti Organometallici, 50019 Sesto Fiorentino (FI), Italy.

e. Department of Industrial Engineering (DIEF) and INSTM Research Unit, University of Florence, 50139 Florence, Italy

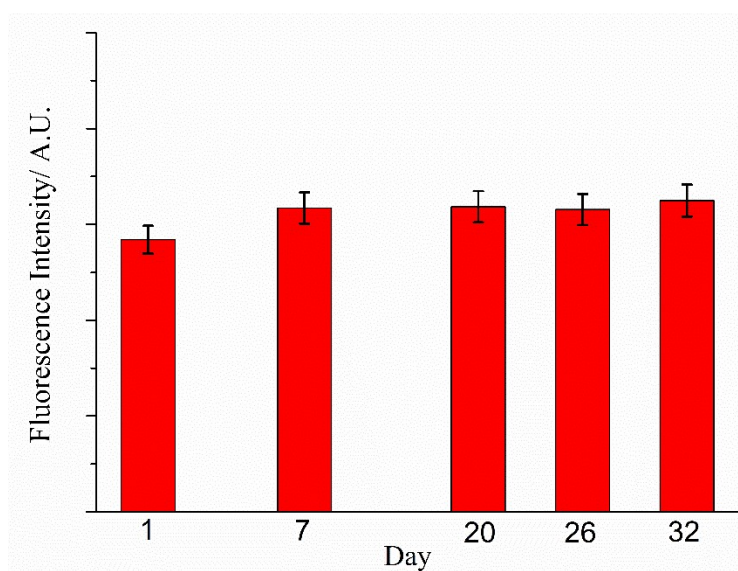

**Figure S1.** Luminescence emission stability of the final Cu NCs solution after 24 h from the end of irradiation and after a volume reduction to 6 mL measured after 1, 7, 20, 26, and 32 days at a  $\lambda_{\text{exc}} = 390$  nm (relative standard deviation RSD=5.13%).

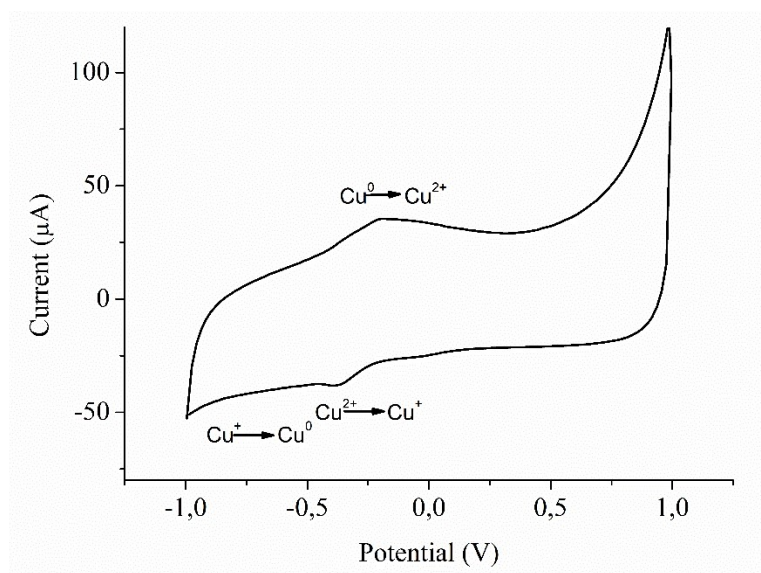

**Figure S2.** CV of final Cu NCs solution after a volume reduction to 6 mL, recorded 5 months after the synthesis.

A CV analysis of Cu NCs synthesised 5 months earlier was conducted to confirm their excellent long-term stability. The data indicate an anodic oxidation peak ( $I_{pa}$ ) of 35.41  $\mu\text{A}$  and a cathodic reduction peak ( $I_{pc}$ ) of 38.88  $\mu\text{A}$ . These two values continue to show that the redox reaction is completely reversible and that the highlighted difference of 3.47  $\mu\text{A}$ , measured between  $I_{pa}$  and  $I_{pc}$ , is consistent with what was already observed of the presence of about 9 %  $\text{Cu}^{2+}$  with respect to the total copper content, as evidenced by CV and magnetic analyses carried out 5 months earlier.

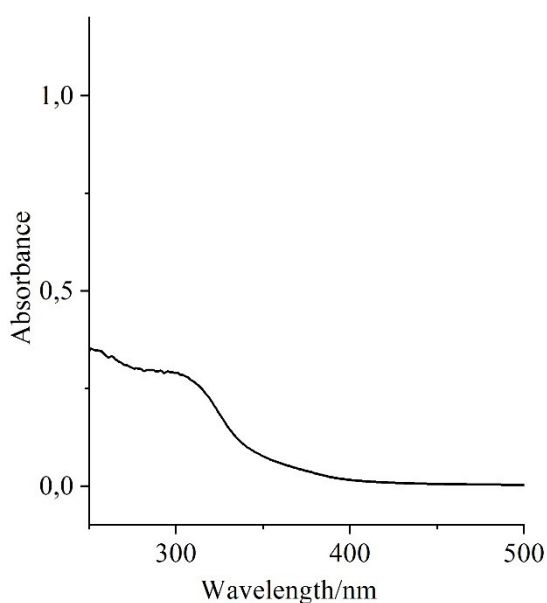

**Figure S3.** UV-vis spectrum of the final Cu NCs solution eight months after the synthesis. The band at 303.9 nm remains unaltered and this observation confirms the excellent stability of these Cu NCs.

### Photothermal conversion efficiency ( $\eta$ ).

Photothermal measurements were performed irradiating a volume of 100  $\mu\text{L}$  of Cu NCs dispersion for 10 minutes in a glass tube (diameter 3 mm), using a continuous wave Laser 405 nm (power 210 mW). A standard infrared thermal imaging camera was used to measure the temperature of solution every 20 seconds, during the heating and cooling processes. The photothermal conversion efficiency ( $\eta$ ) was calculated according to equation (1) introduced by Roper.<sup>1</sup>

$$\eta = \frac{hA(T_{max} - T_{surr}) - Q_{Dis}}{I(1 - 10^{-A})} \quad (1)$$

Where  $T_{\max}$  (30.1 °C) and  $T_{\text{surr}}$  (21.0 °C) represents the max photothermal temperature and the ambient temperature respectively,  $I$  is the incident laser power (210 mW). The absorbance ( $A = 0.36$ ) of Cu NCs at 405 nm. The equations (2) and (3) were introduced to calculate the parameter  $hA$ .

$$\theta = \frac{T - T_{\text{surr}}}{T_{\max} - T_{\text{surr}}} \quad (2)$$

$$\tau = \frac{M_D C_D}{hA} \quad (3)$$

where  $M_D$  and  $C_D$  are the mass (0.1 g) and heat capacity (4.2 J g<sup>-1</sup>) of water respectively, and  $\tau_s$  is the time constant, calculated by the equation (4).

$$t = -\tau(\ln\theta) \quad (4)$$

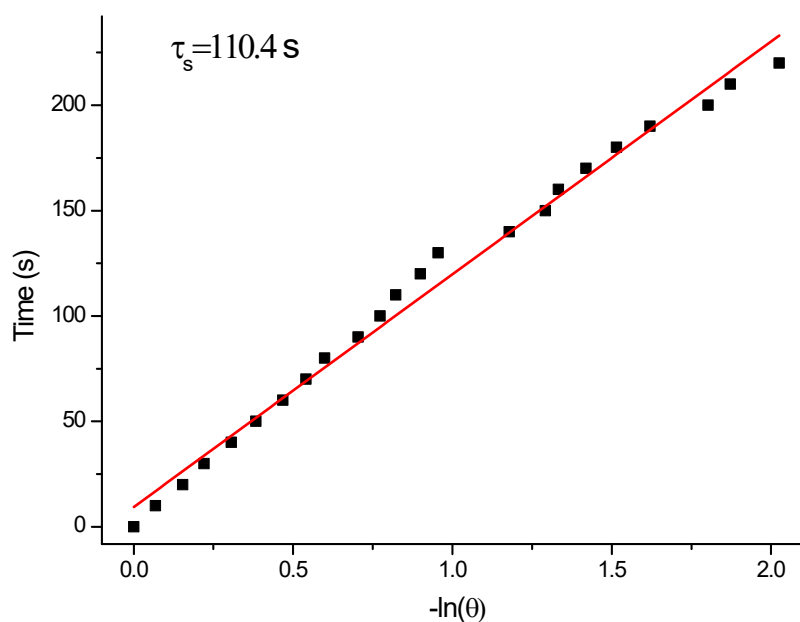

**Figure S4.** Linear relationship between time (sec) and  $-\ln(\theta)$ , the slope is the time constant ( $\tau_s$ ).

1. D. K. Roper, W. Ahn, M. Hoepfner, *J. Phys. Chem. C*, 2007, **111**, 3636-3641.
